# Supplementary material
Source: MDPI journal article supplement (https://www.mdpi.com/2297-8739/9/12/433)
Supplement: s1 [file s1]

## Supplementary information

### **Capsule phase microextraction combined with chemometrics for the HPLC determination of amphotericin B in human serum**

Natalia Manousi<sup>1</sup>, Anastasia Korpeti<sup>1</sup>, Abuzar Kabir<sup>2</sup>, Kenneth G. Furton<sup>2</sup> and Constantinos K. Zacharis <sup>1,\*</sup>

*<sup>1</sup>Laboratory of Pharmaceutical Analysis, Department of Pharmaceutical Technology, School of Pharmacy,  
Aristotle University of Thessaloniki, GR-54124, Greece*

*<sup>2</sup>Department of Chemistry and Biochemistry, Florida International University, Miami, FL, 33199, USA*

---

\*Corresponding author

Constantinos K. Zacharis

Assistant Professor

Laboratory of Pharmaceutical Analysis, School of Pharmacy,

Aristotle University of Thessaloniki (AUTH),

GR-54124, Greece

Tel: +30 2310997663

E-mail: [czacharis@pharm.auth.gr](mailto:czacharis@pharm.auth.gr)

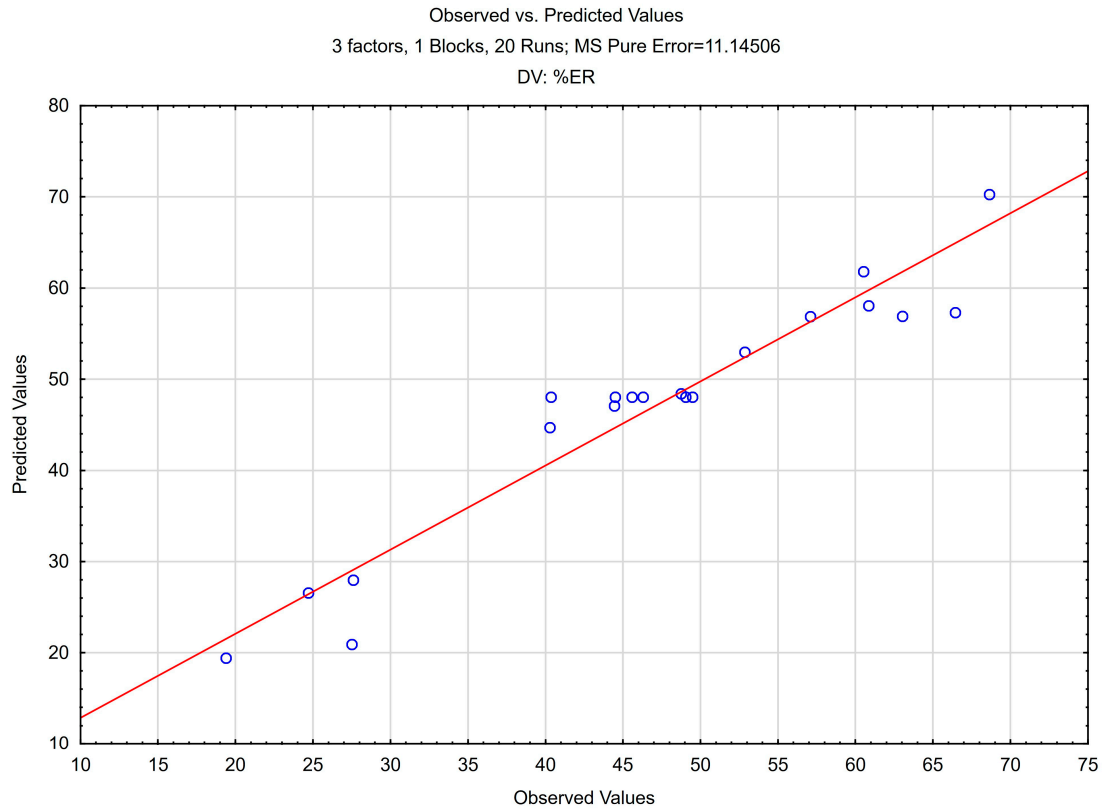

**Figure S1.** Plot of observed and predicted values for FC-CCD for AMB.

**Table S1.** Analysis of variance (ANOVA) for FC-CCD for ER% of AMB.

| Factor                                        | Sum of squares | df | Mean square | F-value  | p-value  |                 |
|-----------------------------------------------|----------------|----|-------------|----------|----------|-----------------|
| $V_s$                                         | 180.343        | 1  | 180.343     | 16.1814  | 0.010095 |                 |
| $V_s^2$                                       | 58.368         | 1  | 58.368      | 5.2371   | 0.070784 |                 |
| $t_{\text{ext.}}$                             | 2574.598       | 1  | 2574.598    | 231.0080 | 0.000022 |                 |
| $t_{\text{ext.}}^2$                           | 339.096        | 1  | 339.096     | 30.4257  | 0.002681 |                 |
| Stirring rate                                 | 262.722        | 1  | 262.722     | 23.5730  | 0.004653 |                 |
| Stirring rate <sup>2</sup>                    | 47.414         | 1  | 47.414      | 4.2543   | 0.094122 |                 |
| $V_s \times t_{\text{ext.}}$                  | 47.176         | 1  | 47.176      | 4.2329   | 0.094745 |                 |
| $V_s \times \text{stirring rate}$             | 46.337         | 1  | 46.337      | 4.1577   | 0.096988 |                 |
| $t_{\text{ext.}} \times \text{stirring rate}$ | 5.739          | 1  | 5.739       | 0.5149   | 0.505145 |                 |
| Lack of Fit                                   | 234.622        | 5  | 46.924      | 4.2103   | 0.070331 | Not significant |
| Pure Error                                    | 55.725         | 5  | 11.145      |          |          |                 |
| Total SS                                      | 3747.308       | 19 |             |          |          |                 |
